# Supplementary material for: Parallel Losses of Blue Opsin Correlate with Compensatory Neofunctionalization of UV-Opsin Gene Duplicates in Aphids and Planthoppers
Source: MDPI journal article supplement (doi:10.3390/insects14090774), 2023-09-20
Supplement: s1 [file s1]

Supplementary Data File S4: Annotated alignment of aphid and planthopper UV-opsin protein sequences. See Figure 1 for species aphid and planthopper species abbreviations. Outgroup sequences: *Chrysochroa rajah* (Craj) UV1-anc (WCQ76393) and UV2-der (WCQ76394), *Frankliniella occidentalis* (Focc) (XP\_026279762).

|                |    |                                                                             |                              |  |            |    |
|----------------|----|-----------------------------------------------------------------------------|------------------------------|--|------------|----|
|                |    |                                                                             | 11                           |  | 11111      |    |
|                | 12 |                                                                             | 345678901                    |  | 23456      |    |
| Btau_rhodopsin | 1  | MN-----                                                                     | GTEGPNFYV-----               |  | PFSNK----- | 16 |
| Craj_UV2-anc   | 1  | MHLTN-----Y--S-VKFP-----                                                    | EAR--VM---D---SGHQLIAWNVPAAD |  |            | 31 |
| Adif_UV2-anc   | 1  | MVWSVSLSAVANPPTMMRLINW--T-DHTIL--A-----                                     | EPR--IM---E---SRPGSMewnISPEN |  |            | 49 |
| Craj_UV1-der   | 1  | MKEMM-----FNG--TFLDGPL--P-----                                              | QAR--VL---S---EERRLLGWNVDNSD |  |            | 36 |
| Adif_UV1-der   | 1  | ML-----LNW--TAIDRPL--P-----                                                 | QLG--GD--SG---HEVRLLGWNIPPSE |  |            | 34 |
| Focc_UV        | 1  | MEYPESAD-C-----SNG--T-AWLpv--A-----                                         | EARIGSGVSGP---SEQRLLGWNVPpDE |  |            | 44 |
| Dcit_UV        | 1  | MESDFY-----LND--T-SIGPVALARVAAQQSFSVNEKLFVPIFSprVAAQQSF-SV---NGKRMLGWNVPpED |                              |  |            | 63 |
| Pcel_UV        | 1  | -----                                                                       | -----                        |  |            | 0  |
| Apis_UV-anc    | 1  | MSPTLIMD-----FNR--T-VSRPL--A-----                                           | QLG--LME-NE--VGETHLGWNlQAED  |  |            | 41 |
| Rmai_UV-anc    | 1  | MSPTLIMD-----FNR--T-VSRPL--P-----                                           | QLG--LME-NE--VGETHLGWNlPAED  |  |            | 41 |
| Mper_UV-anc    | 1  | MSPTMIMD-----FNR--T-VSRPL--Q-----                                           | QLG--LME-NE--VGETHLGWNlPAED  |  |            | 41 |
| Sfla_UV-anc    | 1  | MFPALIMD-----FNR--T-VSRPL--P-----                                           | QMG--SAD-DA--GGETHLGWNlGAED  |  |            | 41 |
| Cced_UV-anc    | 1  | MMM--MD-----FNR--T-VSKPL--P-----                                            | ELG--LLE-NEPGETGRQLGWNlAAED  |  |            | 40 |
| Apis_UV-der    | 1  | MD-----FNR--S-VSRPL--S-----                                                 | QLGSSFME-NE--EELQLMGWNlTPED  |  |            | 36 |
| Rmai_UV-der    | 1  | MD-----FNR--S-VSRPL--S-----                                                 | QLGSSFME-NE--DELQLMGWNlTPED  |  |            | 36 |
| Mperi_UV-der   | 1  | MD-----FNR--S-VSRPL--S-----                                                 | QLGSSFME-NE--DELQLMGWNlTPED  |  |            | 36 |
| Sfla_UV-der    | 1  | MD-----FNR--S-ISRTL--S-----                                                 | QLG--FME-EE--PELHLMGWNlTPED  |  |            | 34 |
| Cced_UV-der    | 1  | MD-----FNG--S-VLRPL--P-----                                                 | QLG--PMD-ND--EEAHLMGWNlTPED  |  |            | 34 |
| Ncin_UV        | 1  | MEFFNGAS-----YNTSS----PVAMA-----                                            | RMG--LG---A---GAPRMLGWNVPtED |  |            | 38 |
| Evit_UV        | 1  | MEVFDGAN-----YNASAA-LFQPQALP-----                                           | RLG--M---P---NGVQMLGWNVPTEE  |  |            | 41 |
| Monu_UV        | 1  | MEYLSGAD-----YNASAA-LFQPQALP-----                                           | RLG--M---P---NGVQMLGWNVPTEE  |  |            | 41 |
| Nlug_UV-anc    | 1  | MEAFGGANNC-----PNG--T-VWGPQ--A-----                                         | S---F---R---TAQRSLIWNVPtDE   |  |            | 37 |
| Lstr_UV-anc    | 1  | MDVFGGAKNC-----PNE--T-VWGPQ--A-----                                         | S---F---R---TAQRSLIWNVPTEE   |  |            | 37 |
| Sfur_UV-anc    | 1  | MDVFGGAKNC-----PNE--T-VWGPQ--A-----                                         | S---F---R---TAQRSLIWNVPTEE   |  |            | 37 |
| Nlug_UV-der    | 1  | MEVFRGASDC-----PNE--S-VWGPQ--V-----                                         | S---F---R---TAERTLIWNVPLEE   |  |            | 37 |
| Lstr_UV-der    | 1  | MDVFGGAKNC-----PNE--T-VWGPQ--V-----                                         | S---F---R---TAERTLIWNVPLEE   |  |            | 37 |
| Sfur_UV-der    | 1  | MDVFSGAKNC-----PNE--T-VWGPQ--A-----                                         | S---F---R---TAERTLIWNVPLEE   |  |            | 37 |

|                |    |                                                                                      |                                                      |     |
|----------------|----|--------------------------------------------------------------------------------------|------------------------------------------------------|-----|
|                |    | 111222222233333333---3333344444444445555555555666666666777777777778888888889999999   |                                                      |     |
|                |    | 789012345678901234---56789012345678901234567890123456789012345678901234567890123456  |                                                      |     |
| Btau_rhodopsin | 17 | TGVVRSPEAPQYYLAEP---WQFSMLAAYMFLLIMLGFPINFLTLYVTVQHKKLRTPNLNLAVALDFMVFGGFTTTLY       | 96                                                   |     |
| Craj_UV2-anc   | 32 | --L---EHIPEHWLKYPAPEASLHLLGLLYIGLFMSILGNGLVLWIFSSAKCLRTPSNMFIVNLAFCDFVMML-KTPIFIY    | 108                                                  |     |
| Adif_UV2-anc   | 50 | --I---PYVPEHWLKFPPEMSLNLGLLYIVFFMSIIGNGLVIWIFSTAKSLRTPSNMFVVNLAFLDFVMML-KTPIFIF      | 126                                                  |     |
| Craj_UV1-der   | 37 | --L---VHIPEHWLKYPEPEASIHFLGLLYILYFLMSTIGNGLVLWIFSSKSLRTPSNLFVVNLAFCDLIMLL-KAPLFVY    | 113                                                  |     |
| Adif_UV1-der   | 35 | --L---VHIPEHWLKYPEPEASLHFLLLILLYLICFLLSTVGNGMVIWIFSTAKSLRTPSNMFVVNLAFLDFIMLS         | 111                                                  |     |
| Focc_UV        | 45 | --L---PHIPTHWLVPEDPLINYGLGVLYCFFFFFFAVMGNGIVIIYIFLTSKNLKTSPSNIFVVNLAICDFVMMA-KTPIFIY | 121                                                  |     |
| Dcit_UV        | 64 | --R---FRIPEHWFQYEEIDPMYNYVLGCLYIVFTIFISICGNGMVIWVFIAAKSLRTPSNIFVLNLALMDFMMMV-KTPIFIY | 140                                                  |     |
| Pcel_UV        | 64 | -----MNNYILGSLYCVFCAVSLIGNGLVIWIFLTAKALRTPSNLFVVNLAIMDFVMML-KTPIFIY                  | 161                                                  |     |
| Apis_UV-anc    | 42 | --L---IHIPEHWLKYQEPSSLQHYYLAFMYTI                                                    | FMFVALFGNGLVIWVFCVAKPLRTPSNIFVINLALCDFVMMA-KAPIFIL   | 118 |
| Rmai_UV-anc    | 42 | --L---IHIPEHWLKYQEPSSALQHYYLAFMYTL                                                   | FTTIALFGNGLVIWIFCIAKPLRTPSNIFVINLALCDFVMMA-KAPIFIY   | 118 |
| Mper_UV-anc    | 42 | --L---IHIPEHWLKYQEPSSLQHYYLAFMYTI                                                    | FTTFVALFGNGLVIWIFCIAKPLRTPSNIFVINLALCDFVMMA-KSPIFIY  | 118 |
| Sfla_UV-anc    | 42 | --L---IHIPEHWLKYEEPSSALQHYYLAFMYTI                                                   | FTTIALVGNGGLVIWIFCISKSLRTPSNIFVINLALCDFLMMMA-KAPIFIY | 118 |
| Cced_UV-anc    | 41 | --L---VHIPDHWNLYQEPSSLSHYYLAFMYSI                                                    | FTTIFALVGNGGLVIWIFCVAKPLRTPSNIFVINLALCDFCMMA-KAPIFIY | 117 |
| Apis_UV-der    | 37 | --L---THIPEHWLSYPEVRSLYHYILAFSYTI                                                    | LFCLGVIGNGLVLWIFCVSKPLRTPSNLFVLNLALCDFSMVL-VLPILY    | 113 |
| Rmai_UV-der    | 37 | --L---THIPEHWLSYPEVRSLYHYILAFAYTI                                                    | LFSLGVIGNGLVLWIFCVSKPLRTPSNLFVLNLALCDFSMVL-VLPILY    | 113 |
| Mper_UV-der    | 37 | --L---THIPEHWLSYPEVRSLYHYILAFAYTI                                                    | LFCLGVIGNGLVLWIFCVSKPLRTPSNLFVLNLAMCDFSMVL-VLPILY    | 113 |
| Sfla_UV-der    | 35 | --L---IHIPEHWLSYPEVRSIYHYILAFMYSI                                                    | LFSLGVIGNGLVLWIFCVSKPLRTPSNLFVLNLALCDFSMVL-VLPILY    | 111 |
| Cced_UV-der    | 35 | --L---VHVPEHWLSYPEVRSMYHYIMAFSYSI                                                    | LFVIGIIGNGLVIWIFSLSKPLRTPSNLFVLNLALCDFSMVL-VLPILY    | 111 |
| Ncin_UV        | 39 | --L---VHIPQHHLKYQAPAMQHMYLGFYIYFFMIASLIGNGLVIWIFCGARNLRTPSNMFVINLAICDFMMML-KTPIFIY   | 115                                                  |     |
| Evit_UV        | 42 | --L---VHIPQHHLKYPAPEPIQHYVLGFLYIYFFMFAALFGNGLVIWIFCGAKNLRTPSNMFVINLALCDFLMMS-KTPIFIY | 118                                                  |     |
| Monu_UV        | 42 | --L---VHIPQHHLKYPAPEPIQHYVLGFLYIYFFMFAALFGNGLVIWIFCGAKNLRTPSNMFVINLALCDFLMMS-KTPIFIY | 118                                                  |     |
| Nlug_UV-anc    | 38 | --L---ANPEHWFNYPEPDMYNYVLGLLYVYFMFFSL                                                | IGNGLVIWIFCSAKSLRTPSNMFVVNLAICDFMMMV-KTPIFIY         | 114 |
| Lstr_UV-anc    | 38 | --L---PHPEHWFNYPEPDMYNYVLGLLYVYFMFFSL                                                | VGNGLVIWIFCSAKSLRTPSNMFVVNLAICDFLMML-KTPIFIY         | 114 |
| Sfur_UV-anc    | 38 | --L---PHPEHWFNYPEPDMYNYVLGLLYVYFMFFSL                                                | VGNGLVIWIFCSAKSLRTPSNMFVVNLAICDFMMML-KTPIFIY         | 114 |
| Nlug_UV-der    | 38 | --L---EHVPEHWFNHPAPEPIYNYVLGLVYMFYMFSS                                               | IGNGLVIWIFSSAKTLRTPSNMFVVNLAICDLLMMV-KIPIFIY         | 114 |
| Lstr_UV-der    | 38 | --L---EHVPEHWFNHPAPEPIYNYVLGLVYMFYMFSS                                               | VGNGLVIWIFSSAKSLRTPSNMFVVNLAICDLLMMI-KIPIFIY         | 114 |
| Sfur_UV-der    | 38 | --L---EHVPEHWFNHPAPEPIYNYILGLVYMFYMFSS                                               | VGNGLVIWIFSSAKSLRTPSNMFVVNLAICDLLMMV-KIPIFIY         | 114 |

|                |     |                                                                                                                                             |                                                                                             |  |
|----------------|-----|---------------------------------------------------------------------------------------------------------------------------------------------|---------------------------------------------------------------------------------------------|--|
|                |     |                                                                                                                                             | 11111111111111111111111111111111111111111111111111111111111111111111111111111111111-1111111 |  |
|                |     |                                                                                                                                             | 9999000000000111111111122222222233333333334444444444555555555566666666777-7777777           |  |
|                |     |                                                                                                                                             | 7890123456789012345678901234567890123456789012345678901234567890123456789012-3456789        |  |
| Btau_rhodopsin | 97  | TSLHGYFVFGPTGCNLEGGFATLGGEIALWSLVLAIERYVVVCKPMSNFRFGENHAIMGVAFTWVMALACAAPPL-VGWSRYI                                                         | 179                                                                                         |  |
| Craj_UV2-anc   | 109 | NSFNRGFAAGFVSCQVFVGMTLSGIGAGMSNACIAYDRYHTITNPLEG-KLTRTKALVMILFVWTYTTPWAILPLFEIWGKFV                                                         | 191                                                                                         |  |
| Adif_UV2-anc   | 127 | NSFKQGFLYSMVWCYVFIAGTYSIGIGASMTNVCIAYDRYHTITNPMEG-RLTRTKALLMILFIYVYVTPFAILPYLKIWNFI                                                         | 209                                                                                         |  |
| Craj_UV1-der   | 114 | NAFNRGYATGHIGCQIFAMVGSLSGIGAGTTNACIAYDRYTITNPLEG-RLSKTKAVILIIFVWMYTMPVWVLPLEIWSRFV                                                          | 196                                                                                         |  |
| Adif_UV1-der   | 112 | NAFHRYGAAGHLGCQIFGTIGTLSSGIGAGMTDVCIAIDRYTITNPLEG-RMSKIKAIIMIIFFWLTYLPWIILPFTEVWNRFV                                                        | 194                                                                                         |  |
| Focc_UV        | 122 | NSFNLGPASGPTACLVFATMGFSFGIGAGATNAVIAIDRYMTIAKPFGS-KMTRGKAIMIIFFLWMVWPVWVPATEIWGRFV                                                          | 204                                                                                         |  |
| Dcit_UV        | 141 | NSFNQGYALGHQCQIFGLMGSISGIGQSATNVAIAYDRYRVIAKPMDG-RMSYSKALMILILICYVIPWAMPFPYLEKWSRFV                                                         | 223                                                                                         |  |
| Pcel_UV        | 162 | NSFHQQYELGHQCQWFGLMGAITGIGQSATNVAIAYDRYRVIAKPMDG-RMSFSKAFIILIMIYAYVLPWALFPFYFEKWSRFV                                                        | 144                                                                                         |  |
| Apis_UV-anc    | 119 | GSINR <b>G</b> Y-QGHFLCQLFGTAGAFSGIGA <b>S</b> ATNAAIAYDRFSTIAKPF <b>DG</b> -RMTY <b>G</b> R <b>A</b> FFLIICIWYTYLPWGLLPLTEKNWRYV           | 200                                                                                         |  |
| Rmai_UV-anc    | 119 | SSINR <b>G</b> Y-QGHFLCQLFGVAGAFSGGLA <b>S</b> ATNAAIAYDRFSTIAKPF <b>DG</b> -RMTY <b>G</b> R <b>A</b> LFLIVICIWYTYLPWGILPLTEKNWRFV          | 200                                                                                         |  |
| Mper_UV-anc    | 119 | SSINR <b>G</b> Y-QGHFLCQLFGVAGAFSGGLA <b>S</b> ATNAAIAYDRFSTIAKPF <b>DG</b> -RMTY <b>G</b> R <b>A</b> FFLIICIWYTYLPWGLLPLTEKNWRYV           | 200                                                                                         |  |
| Sfla_UV-anc    | 119 | GSVQR <b>T</b> Y-QGHFLCQAFALAG <b>T</b> ISGLGA <b>S</b> ITNAAIAYDRYSTIAKPF <b>EG</b> -RMTY <b>G</b> R <b>A</b> FFIMILIWAYVFPWCFLPATEKNWRYV  | 200                                                                                         |  |
| Cced_UV-anc    | 118 | NSIQR <b>G</b> Y-QGHLNCQIFAMAC <b>S</b> ISGIGA <b>S</b> ATNAAIAYDRFSTIAKPF <b>DG</b> -RMTF <b>G</b> K <b>A</b> FLIICIWYTVLPWCFLPLTEKNWRFV   | 199                                                                                         |  |
| Apis_UV-der    | 114 | DSIDH <b>K</b> Y-PGHLQCQIFALCG <b>S</b> ISGIGA <b>G</b> ATNAAIAYDRYSTIAKPF <b>EG</b> -RMTY <b>G</b> K <b>A</b> LILIIICIWIYVLPWCLLPLTEKNWRFV | 195                                                                                         |  |
| Rmai_UV-der    | 114 | DSINH <b>K</b> Y-PGHLQCQIFALCG <b>S</b> ISGIGA <b>G</b> ATNAAIAYDRYSTIAKPF <b>EG</b> -RMTY <b>G</b> K <b>A</b> LILIIICIWIYVLPWCILPLTEKNWRFV | 195                                                                                         |  |
| Mper_UV-der    | 114 | DSIDH <b>K</b> Y-PGHLQCQIFALCG <b>S</b> ISGIGA <b>G</b> ATNAAIAYDRYSTIAKPF <b>EG</b> -RMTY <b>G</b> K <b>A</b> LILIIICIWIYVLPWCLLPLTEKNWRYV | 195                                                                                         |  |
| Sfla_UV-der    | 112 | DSINH <b>K</b> Y-PGHLQCQIFALCG <b>S</b> ISGIGA <b>G</b> ATNAAIAYDRYSTIAKPF <b>EG</b> -RMTY <b>G</b> K <b>A</b> LILIIICIWMYVFPWCFLPLTEKNWRYV | 193                                                                                         |  |
| Cced_UV-der    | 112 | DSIDH <b>K</b> Y-PGHLQCQIFALCG <b>S</b> ISGIGA <b>G</b> ATNAAIAYDRYSTIAKPF <b>EG</b> -RMTY <b>G</b> K <b>A</b> LILIVICIWIWVPWCYLPLSEKNWRYV  | 193                                                                                         |  |
| Ncin_UV        | 116 | NSFNLGFALGQTGCQCVFSIMGSLSGIGAAATNAAIAYDRYSTIARPLDG-KMSRGKAFLFILCIWAYVSPWVFLPATQTWGRYA                                                       | 198                                                                                         |  |
| Evit_UV        | 119 | NSFKLGFALGQFWCQVFAIAGSLSGIGAAATNAVIAIDRYSTIARPLDG-KMSKGKAFLFLLCIWIYTPPWVFLPATQTWGRYA                                                        | 201                                                                                         |  |
| Monu_UV        | 119 | NSFKLGFALGQFWCQVFAIAGSLSGIGAAATNAVIAIDRYSTIARPLDG-KMSKGKAFLFLLCIWIYTPPWVFLPATQTWGRYA                                                        | 201                                                                                         |  |
| Nlug_UV-anc    | 115 | NSFNLGFATGHLGCQIFATI GSFGSIGASATNAAIAYDRYNVI AKPLDG-RMSKGKAFLILLIWAYVTPWSLMPLYGVWSRFV                                                       | 197                                                                                         |  |
| Lstr_UV-anc    | 115 | NSFNLGFASGHLGCQIFGTIGSFSGIGASATNAAIAYDRYNVIAKPFDG-KMSKGKAFLILLIWAYVTPWSLMPLYGYWSRFV                                                         | 197                                                                                         |  |
| Sfur_UV-anc    | 115 | NSFNLGFASGHLGCQIFGTIGSFSGIGASATNAAIAYDRYNVIAKPFDG-KMSKGKAFLILLIWAYVTPWSLMPLYGYWSRFV                                                         | 197                                                                                         |  |
| Nlug_UV-der    | 115 | NSFNLGFAAGHLGCQIFGTIGSFSGIGASATNAAIAYDRYNVIAKPFDG-KMSRGKAFLILLIWAYVTPWSIMPLLEVWSRFV                                                         | 197                                                                                         |  |
| Lstr_UV-der    | 115 | NSFNLGFAAGHVGCQIFGTIGSFSGIGASATNAAIAYDRYNVIAKPFDG-KMSRGKAFLILLIWAYVTPWSIIPLEVWSRFV                                                          | 197                                                                                         |  |
| Sfur_UV-der    | 115 | NSFNLGFAAGHLGCQIFGTIGSFSGIGASATNAAIAYDRYNVIAKPFDG-KMSRGKAFLILLIWAYVTPWSIMPLFEVWSRFV                                                         | 197                                                                                         |  |

[illegible]

[illegible]

|                |              |                                     |     |  |
|----------------|--------------|-------------------------------------|-----|--|
|                | 333333333333 | 33                                  | 333 |  |
|                | 333333334444 | 44                                  | 444 |  |
|                | 34567890123  | 45                                  | 678 |  |
| Btau_rhodopsin | 333          | -ASTTVSKTETS-QV-APA-----            | 348 |  |
| Craj_UV2-anc   | 356          | -SDTQSTATESS-TN-K---P-----          | 370 |  |
| Adif_UV2-anc   | 374          | -SDAQSVTTETA-SK-----G-----          | 387 |  |
| Craj_UV1-der   | 361          | -TDTASAVTEAS-NP-ATR-T-----          | 377 |  |
| Adif_UV1-der   | 359          | -SDSASVATESA-AP-NTGKI-----          | 376 |  |
| Focc_UV        | 370          | ASETASTTTEAT-SA-NPD-----            | 386 |  |
| Dcit_UV        | 389          | -KETASAQTEAT-T---P-----H            | 402 |  |
| Pcel_UV        | 310          | -KETASANTEAT-T---P-----H            | 323 |  |
| Apis_UV-anc    | 367          | AS <b>E</b> TQSTTTA-----A           | 377 |  |
| Rmai_UV-anc    | 367          | AS <b>E</b> TQSTTTTT-----A          | 378 |  |
| Mper_UV-anc    | 366          | PS <b>E</b> TQSTTTTT-----A          | 377 |  |
| Sfla_UV-anc    | 367          | AS <b>E</b> TQSTTTTT-----A          | 378 |  |
| Cced_UV-anc    | 366          | VS <b>E</b> TQSATTT-----A           | 376 |  |
| Apis_UV-der    | 361          | TS <b>D</b> TQSITTA-----A           | 371 |  |
| Rmai_UV-der    | 361          | TS <b>D</b> TQSITTA-----A           | 371 |  |
| Mper_UV-der    | 361          | TS <b>D</b> TQSITTA-----A           | 371 |  |
| Sfla_UV-der    | 359          | SP <b>D</b> TQSTTTT-----A           | 369 |  |
| Cced_UV-der    | 359          | LA <b>E</b> TQSTTTS-----A           | 369 |  |
| Ncin_UV        | 363          | SE-TVSTTTETTAA-TTPA-----E           | 380 |  |
| Evit_UV        | 367          | HDNVSTTTTEAT-A-TTPA-----E           | 384 |  |
| Monu_UV        | 367          | HDNVSTTTTEAT-A-TTPA-----E           | 384 |  |
| Nlug_UV-anc    | 363          | -SETQS <b>A</b> VTETT-AS-TPAES----- | 380 |  |
| Lstr_UV-anc    | 363          | -SETQS <b>A</b> VTETT-AT-TPAE-----  | 379 |  |
| Sfur_UV-anc    | 363          | -SETQS <b>A</b> VTETT-AT-TPAE-----  | 379 |  |
| Nlug_UV-der    | 363          | -SETQS <b>T</b> VTEST-VTATPAE-----  | 380 |  |
| Lstr_UV-der    | 363          | -SETQS <b>T</b> VTEST-VTAPPAE-----  | 380 |  |
| Sfur_UV-der    | 363          | -SETQS <b>T</b> VTEST-VSATPAVTATECN | 386 |  |
